# Supplementary material
Source: Springer Nature journal article supplement (https://www.springermedizin.de/resource/supplementary/12879_2012_2477_MOESM2_ESM.pdf/9444664)
Supplement: MOESM2 [file 9444664]

## ICD-9-CM codes

The definition of pneumonia based on primary discharge diagnosis with any of the following:

| <b>ICD-9-CM diagnosis</b> | <b>Description</b>                                                  |
|---------------------------|---------------------------------------------------------------------|
| 481                       | Pneumococcal pneumonia ( <i>streptococcus pneumoniae</i> pneumonia) |
| 482.xx                    | Other bacterial pneumonia                                           |
| 483.x                     | Pneumonia due to other specified organism                           |
| 484.3                     | Pneumonia in whooping cough                                         |
| 484.5                     | Pneumonia in anthrax                                                |
| 485                       | Bronchopneumonia organism unspecified                               |
| 486                       | Pneumonia organism unspecified                                      |
| 487.0                     | Influenza with pneumonia                                            |
| 507.0                     | Pneumonitis due to inhalation of food or vomitus                    |

We chose to omit fungal infections, viral infections other than influenza and did not include lung abscess or empyema since these should not be used alone without a diagnosis of pneumonia.

For the diagnosis of sepsis the below ICD-9-CM diagnosis codes were utilized.

| <b>ICD-9-CM diagnosis</b> | <b>Description</b>   |
|---------------------------|----------------------|
| 038.xx                    | Septicemia           |
| 040.82                    | Toxic shock syndrome |

|         |                                                                                                |
|---------|------------------------------------------------------------------------------------------------|
| 785.52  | Septic shock                                                                                   |
| 995.91* | Systemic inflammatory response syndrome due to infectious process<br>without organ dysfunction |
| 995.92* | Systemic inflammatory response syndrome due to infectious process with<br>organ dysfunction    |

\* ICD-9-CM code became effective in January 2003
